# Supplementary material
Source: publisher figshare collection journal article supplement (https://acs.figshare.com/ndownloader/files/3754435)
Supplement: Supplementary file 1 [file 3754435]

## SUPPORTING INFORMATION

### **Beyond a fluorescent probe: Inhibition of cell division protein FtsZ by *mant*-GTP elucidated by NMR and biochemical approaches**

Sonia Huecas,<sup>†#</sup> Filipa Marcelo,<sup>†‡#</sup> Almudena Perona,<sup>||</sup> Laura B. Ruiz-Ávila,<sup>†</sup> Antonio Morreale,<sup>||</sup> F. Javier Cañada,<sup>†</sup> Jesús Jiménez Barbero,<sup>\*†</sup> and José M. Andreu<sup>\*†</sup>

<sup>†</sup>Centro de Investigaciones Biológicas, CIB-CSIC, Ramiro de Maeztu 9, 28040 Madrid, Spain

<sup>‡</sup>UCIBIO, REQUIMTE, Dept. de Química, Faculdade de Ciências e Tecnologia, UNL, 2829-516 Caparica, Portugal

<sup>||</sup>Unidad de Bioinformática, Centro de Biología Molecular, CBMSO-CSIC, Cantoblanco, 28049 Madrid, Spain

**CONTENTS:** Figures S1 to S6. Molecular dynamics Movies M1\_2O'-mant-GTP, M2\_3O'-mant-GTP and M3\_GTP, which are available free of charge via the Internet at <http://pubs.acs.org>

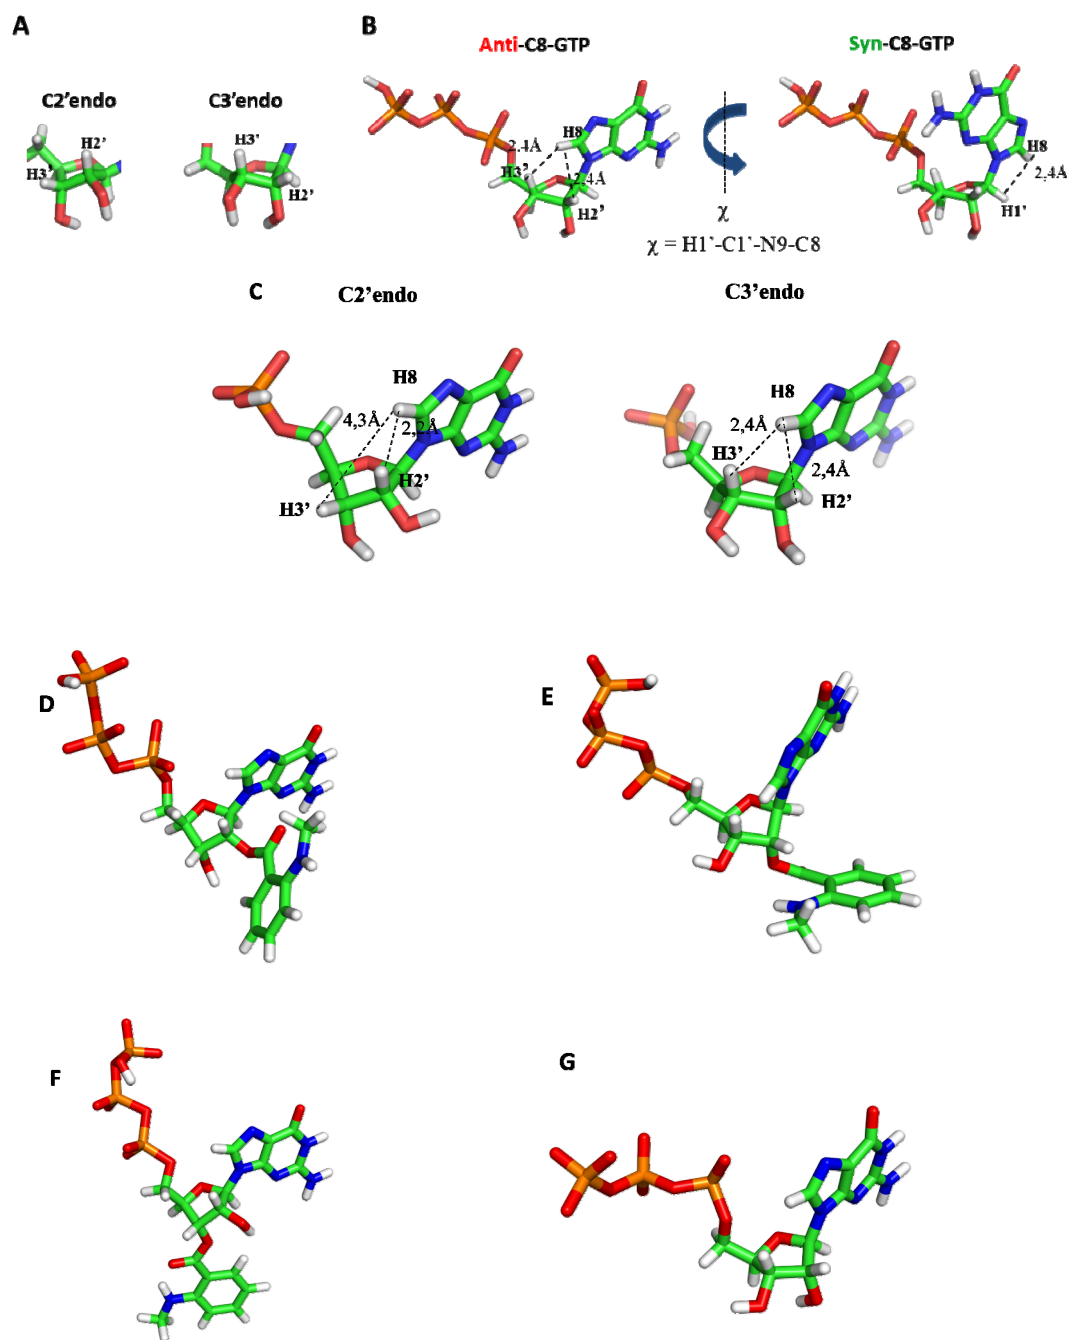

**Figure S1, related to Figure 1 and Figure 2A. Guanosine nucleotide conformations.** **A.** ribose puckering: C2'endo vs C3'endo. **B.** glycosidic torsion angle  $\chi$  (H1'-C1'-N9-C8) and H/H proton distances for anti or syn-type conformations. **C.** H8-H2' and H8-H3' proton distances for the anti-type conformation and their relation with the C2'endo and C3'endo ribose puckering geometries. **D-F.** Selected mant-GTP structures in agreement with the NMR data that populate the major local minima found by molecular mechanics calculations. **D.** 2'-mant-GTP, anti-type, 2'endo; **E.** 2'-mant-GTP, anti-type, 3'endo; **F.** 3'-mant-GTP, anti-type, 2'endo; **G.** Non substituted GTP, anti-type, 2'endo.

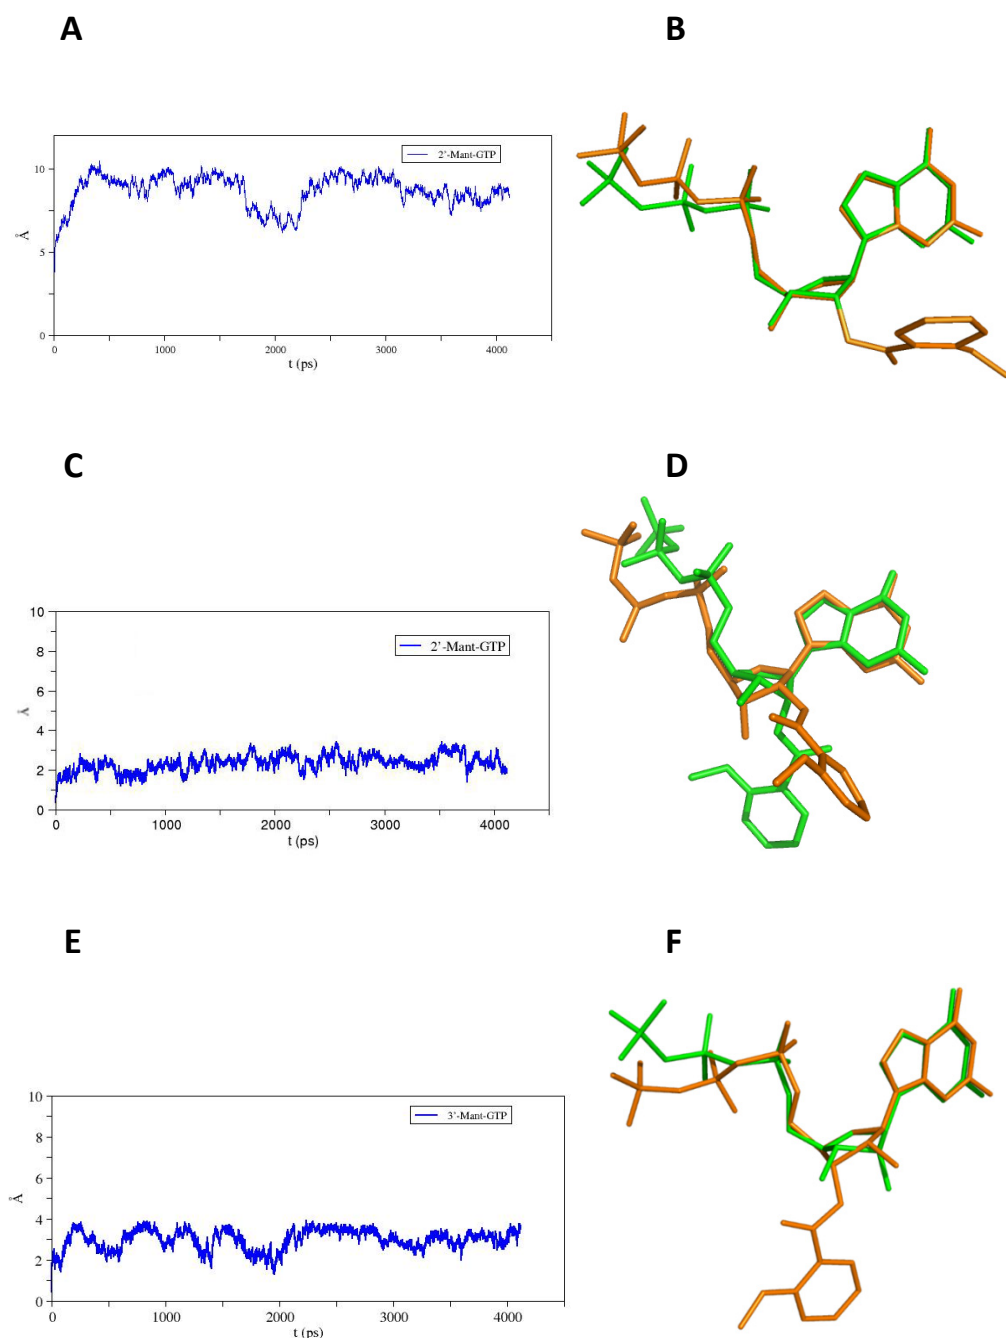

**Figure S2. Molecular dynamics simulations of free mant-GTP, related to main text.** **A.** RMSD value (Å) evolution along the MD simulation of 2'-mant-GTP C3'-endo in water. 2'-mant-GTP remained in the C3'-endo conformation. **B.** Superposition of the final MD model structure of free 2'-mant-GTP (orange) with the crystal structure of GTP (green) bound to Mj-FtsZ (PDB entry: 1w5a) **C.** RMSD evolution along the MD simulation of 2'-mant-GTP C2' endo, which remained in the C2' endo conformation. **D.** Superposition of the 3'endo (green) and 2'endo (orange) conformations of 2'-mant-GTP. **E.** .RMSD evolution along the MD simulation of 3'-mant-GTP in water. During the first 2 ns, 3'-mant-GTP kept the initial C3'-endo puckering, then it changed to C2'-endo for the remaining time. **F.** Superposition of the final MD model structure of free 3'-mant-GTP (orange, C2'-endo ribose puckering) with the crystal structure of GTP (green, C3'-endo) bound to Mj-FtsZ (PDB: 1w5a).

**A**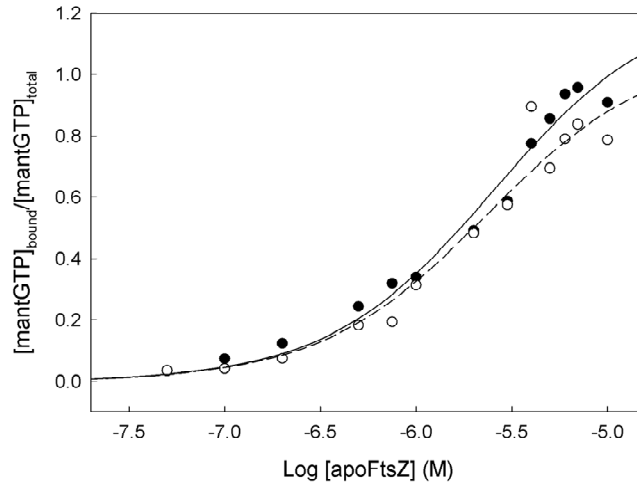**B**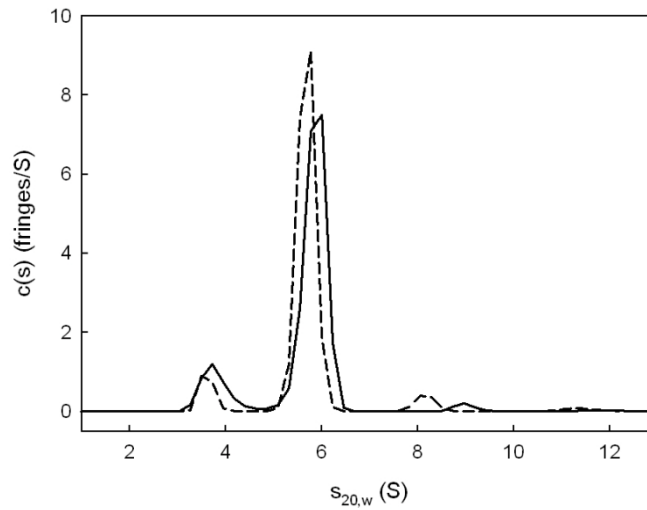

**Figure S3, related to Figure 2B-C. Biochemical characterization of FtsZ-*mant*-GTP interactions under NMR experimental conditions. A. Binding of *mant*-GTP by FtsZ.** Titrations of *mant*-GTP (50 nM) binding by nucleotide-devoid Mj-FtsZ in Tris-H<sub>2</sub>O buffer (○) and in D<sub>2</sub>O buffer (●), both with 10 mM MgCl<sub>2</sub> added, measured by fluorescence anisotropy at 25 °C. The lines in each case correspond to the best single site model fits to the data:  $K_b$   $(4.3 \pm 1.7) \times 10^5 \text{ M}^{-1}$  in aqueous buffer and  $(3.9 \pm 2.3) \times 10^5 \text{ M}^{-1}$  in deuterated buffer, with  $1.1 \pm 0.1$  and  $1.2 \pm 0.1$  binding sites respectively. **B. FtsZ association state with *mant*-GTP and GTP.** AUC sedimentation velocity profiles of Mj-FtsZ (30  $\mu\text{M}$ ) in Tris-D<sub>2</sub>O buffer (no MgCl<sub>2</sub>) at 25°C, in the presence of *mant*-GTP (0.6 mM, solid line) or GTP (1.2 mM, dashed line). *Mant*-GTP: 82.2%  $s_{20,w}=5.8\text{S}$ , 14.5%  $s_{20,w}=3.8$  and 1.9%  $s_{20,w}=8.9\text{S}$ . GTP: 86.7%  $s_{20,w}=5.7\text{S}$ , 7.8%  $s_{20,w}=3.5\text{S}$  and 4%  $s_{20,w}=8$ .

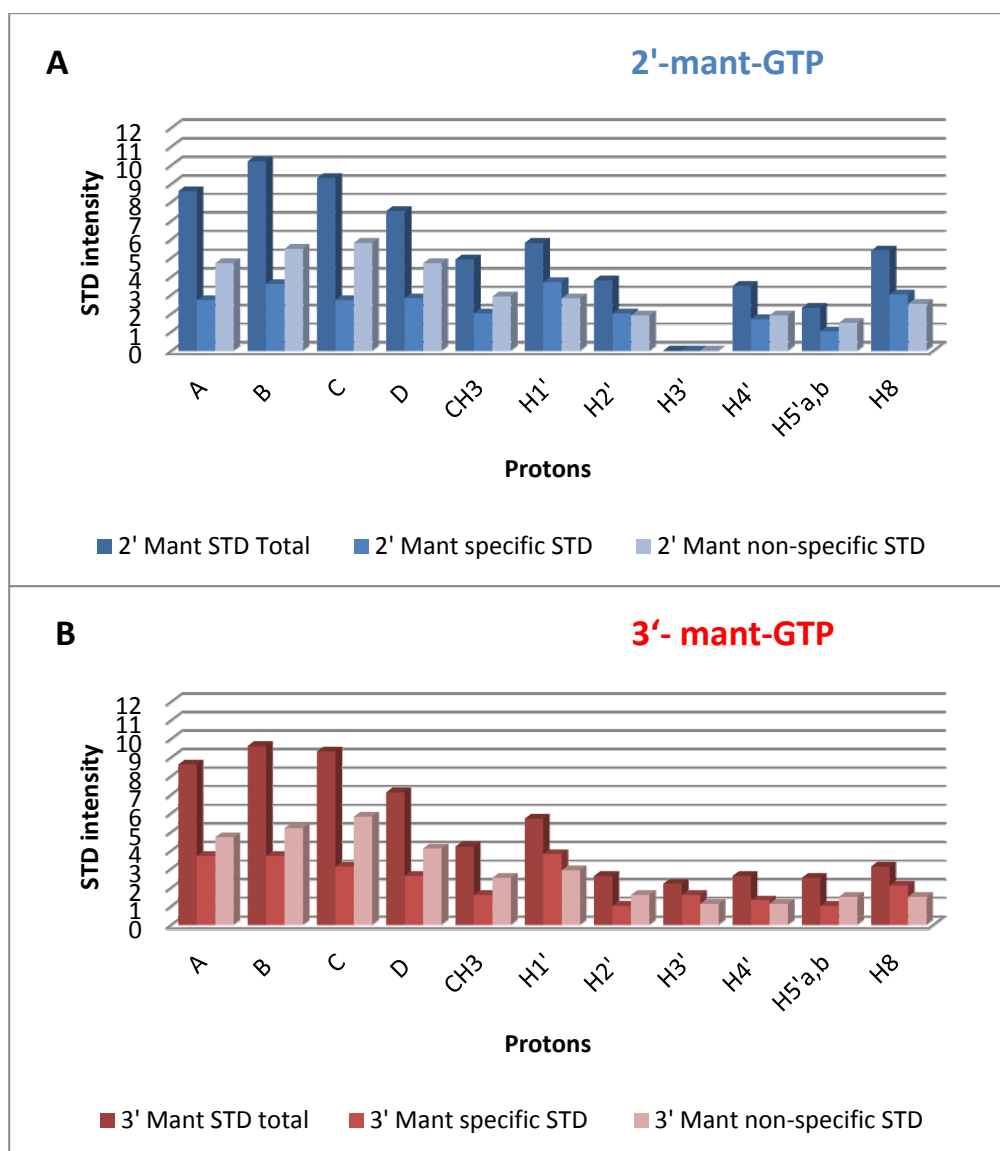

**Figure S4, related to Figure 3. STD-NMR total, specific and non-specific intensities in binding experiments of mant-GTP to Mj-FtsZ. A. 2'- mant-GTP B. 3'-mant-GTP.** Non specific intensities were determined in a 4-fold GTP excess over mant-GTP and subtracted from the total intensities to provide the specific intensities. For both isomers the non-specific contribution mostly arises from the aromatic fluorescent tag moiety. STD intensity values are percentages relative to each off-resonance signal. In the absence of Mj-FtsZ STD intensities were below 0.5% for any of the *mant*-GTP protons measured.

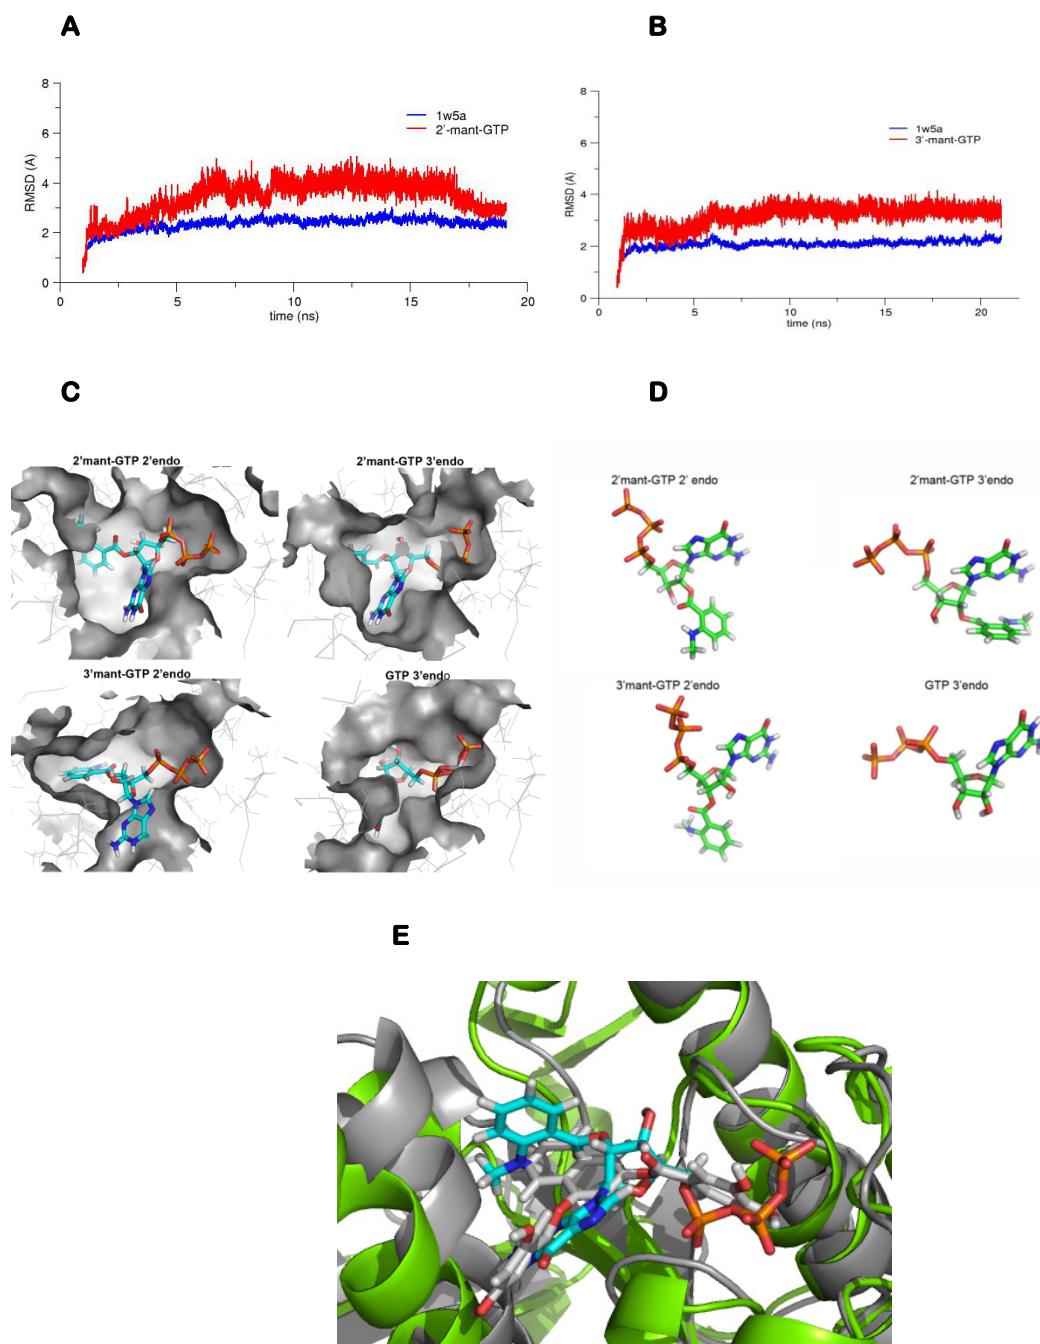

**Figure S5, related to Figure 4. MD simulations of FtsZ-mant-GTP complexes.** **A.** RMSD (Å) evolution along the simulation of the FtsZ-2'-mant-GTP complex. The protein RMSD is depicted in blue and the ligand RMSD is in red. **B.** Corresponding RMSD (Å) values along the simulation of the FtsZ-3'-mant-GTP complex. **C.** 2'-mant-GTP, 3'-mant-GTP, and GTP (atom-colored sticks) bound into the nucleotide binding site of Mj-FtsZ (grey surface representation; from the models in Figure 4). **D.** The different conformations of 2'-mant-GTP, 3'-mant-GTP, and GTP bound to Mj-FtsZ, extracted from the MD models in Figure 4; note that the ligands are colored and presented here in a view similar to the free ligands in Figure S1D-G. **E.** 2'-mant-GTP in the 2'endo conformation bound to a Mj-FtsZ monomer (green protein, cyan ligand; from Figure 4B) aligned to the model complex of Bs-FtsZ with the synthetic inhibitor UCM44 (grey protein and ligand, see main text).



**A**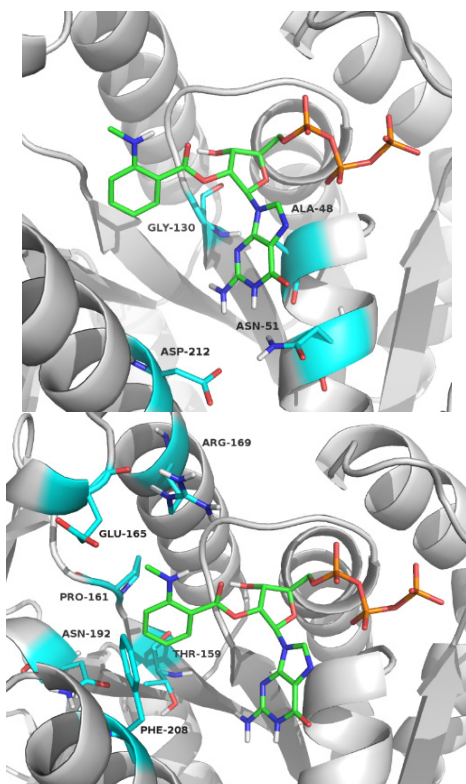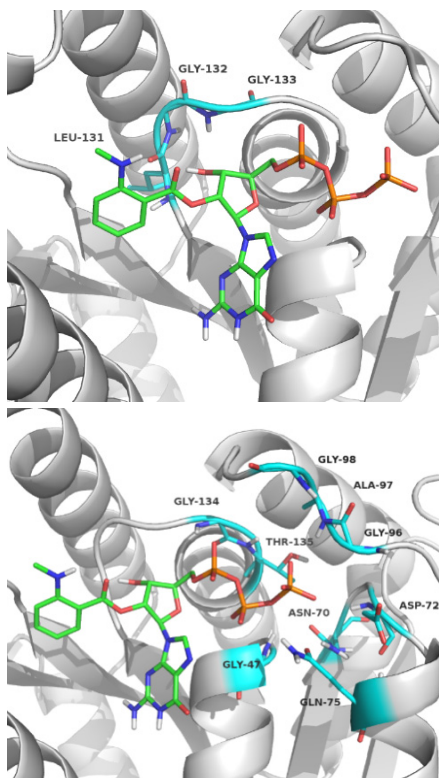**B**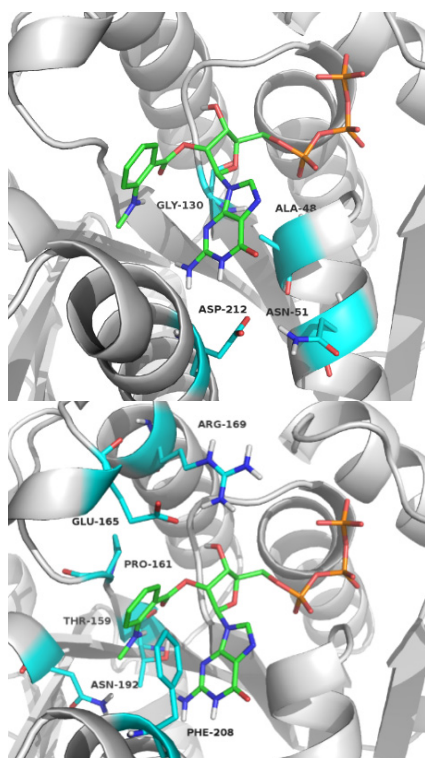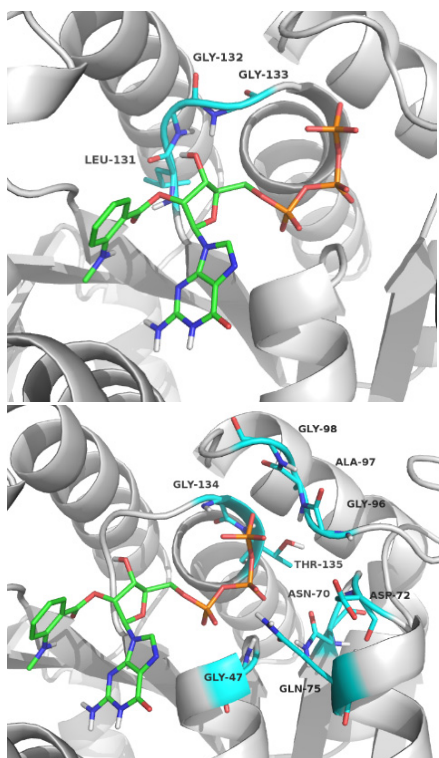

**C**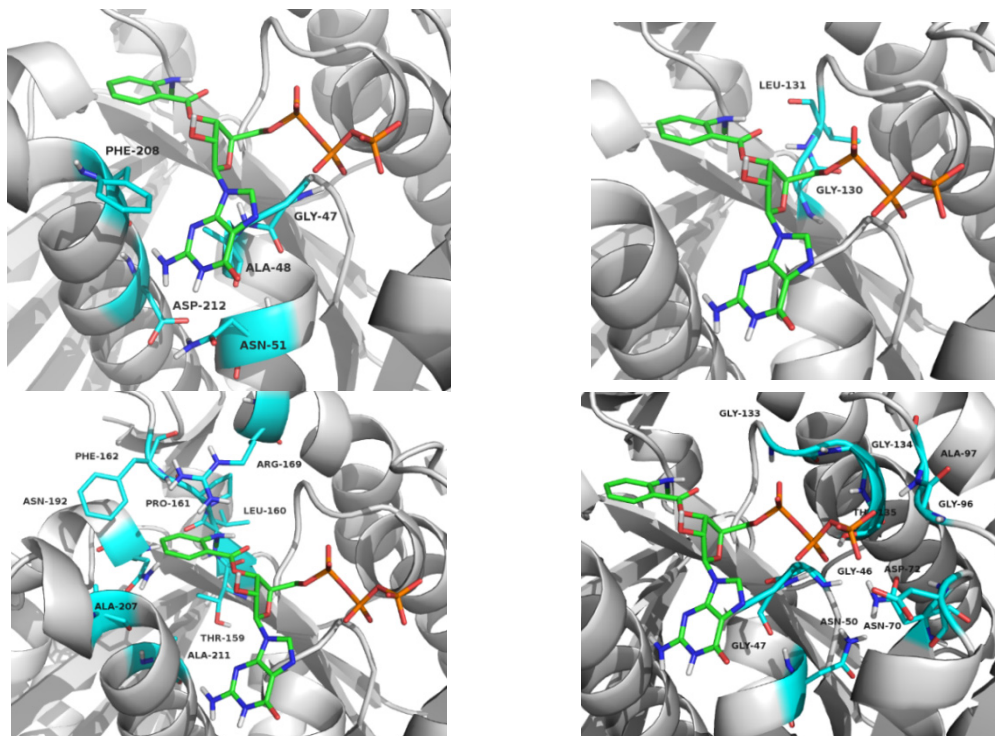

**Figure S6, related to Figure 4. A.** Aminoacid residues of Mj-FtsZ interacting with 2'-mant-GTP in 2'endo conformation during MD simulations. The main residues contacting the base, phosphates and the *mant* tag are highlighted in blue. **B.** Residues interacting with 2'-mant-GTP in 3'endo conformation. **C.** Residues of Mj-FtsZ interacting with 3'-mant-GTP in 2'endo conformation.

**Movies 1, 2 and 3, related to Figure 4, show the molecular dynamics of FtsZ in complex with 2O'-mant-GTP, 3O'-mant-GTP and GTP. They can be found with this supplemental information online**
